# Supplementary material
Source: PubMed Central journal article supplement (PMC2562404)
Supplement: rspb20071188s04.pdf [file rspb20071188s04.pdf]

| SERIAL # | INPUT DATA FROM MEASUREMENT |                                                                                     |                             | FITTED MODEL PARAMETERS |      |      | ERROR<br>$e$<br>cf. eq. (6) | CLASS       |
|----------|-----------------------------|-------------------------------------------------------------------------------------|-----------------------------|-------------------------|------|------|-----------------------------|-------------|
|          | species                     | contour of main cross section                                                       | $R$ =height/<br>width ratio | $k$                     | $p$  | $R$  |                             |             |
| 1        | Geochelone elegans          |    | 0.99                        | -0.19                   | 0.65 | 1.00 | 0.0006                      | $S_3 (S_1)$ |
| 2        | Geochelone elegans          |    | 0.90                        | -0.00                   | 1.04 | 0.88 | 0.0013                      | $S_1$       |
| 3        | Stigmochelys pardalis       |    | 0.87                        | -0.11                   | 0.83 | 0.89 | 0.0009                      | $S_3 (S_1)$ |
| 4        | Stigmochelys pardalis       |    | 0.85                        | -0.27                   | 0.63 | 0.85 | 0.0008                      | $S_3$       |
| 5        | Stigmochelys pardalis       |  | 0.85                        | -0.14                   | 0.63 | 0.85 | 0.0025                      | $S_3$       |
| 6        | Stigmochelys pardalis       |  | 0.85                        | -0.32                   | 0.49 | 0.85 | 0.0015                      | $S_3$       |
| 7        | Geochelone elegans          |  | 0.85                        | -0.06                   | 1.07 | 0.84 | 0.0012                      | $S_2 (S_1)$ |
| 8        | Astrochelys radiata         |  | 0.84                        | -0.00                   | 0.84 | 0.85 | 0.0012                      | $S_3 (S_1)$ |
| 9        | Stigmochelys pardalis       |  | 0.83                        | -0.39                   | 0.48 | 0.83 | 0.0012                      | $S_3$       |
| 10       | Stigmochelys pardalis       |  | 0.82                        | -0.31                   | 0.93 | 0.81 | 0.0007                      | $S_2$       |
| 11       | Stigmochelys pardalis       |  | 0.81                        | -0.38                   | 0.55 | 0.80 | 0.0014                      | $S_3$       |

|    |                                    |                                                                                     |      |       |       |      |        |             |
|----|------------------------------------|-------------------------------------------------------------------------------------|------|-------|-------|------|--------|-------------|
| 12 | <b>Stigmochelys pardalis</b>       |    | 0.79 | -0.39 | 0.51  | 0.79 | 0.0007 | $S_3$       |
| 13 | <b>Stigmochelys pardalis</b>       |    | 0.79 | -0.27 | 0.49  | 0.81 | 0.0010 | $S_3$       |
| 14 | <b>Psammobates tentorius</b>       |    | 0.79 | -0.42 | 0.34  | 0.79 | 0.0013 | $S_3$       |
| 15 | <b>Stigmochelys pardalis</b>       |    | 0.79 | -0.42 | 0.34  | 0.79 | 0.0013 | $S_3$       |
| 16 | <b>Terrapene carolina triungis</b> |    | 0.78 | -0.47 | 0.21  | 0.78 | 0.0028 | $S_3$       |
| 17 | <b>Stigmochelys pardalis</b>       |   | 0.78 | -0.38 | 0.23  | 0.78 | 0.0009 | $S_3$       |
| 18 | <b>Chelonoidis carbonaria</b>      |  | 0.78 | -0.29 | 0.50  | 0.79 | 0.0022 | $S_3$       |
| 19 | <b>Testudo graeca anamurensis</b>  |  | 0.72 | -0.33 | 0.84  | 0.73 | 0.0013 | $S_2$       |
| 20 | <b>Chelonoidis nigra</b>           |  | 0.72 | -0.19 | 0.95  | 0.72 | 0.0013 | $S_2$       |
| 21 | <b>Chelonoidis carbonaria</b>      |  | 0.68 | -0.12 | 0.96  | 0.70 | 0.0023 | $S_2$       |
| 22 | <b>Eurotestudo hermanni</b>        |  | 0.67 | -0.31 | 0.59  | 0.66 | 0.0009 | $S_3 (S_2)$ |
| 23 | <b>Eurotestudo hermanni</b>        |  | 0.65 | -0.34 | 0.34  | 0.65 | 0.0011 | $S_3 (S_2)$ |
| 24 | <b>Terrapene carolina bauri</b>    |  | 0.64 | -0.57 | -0.06 | 0.65 | 0.0013 | $S_3 (S_2)$ |

|    |                                       |                                                                                   |      |       |       |      |        |             |
|----|---------------------------------------|-----------------------------------------------------------------------------------|------|-------|-------|------|--------|-------------|
| 25 | <b>Trachemys scripta elegans</b>      |  | 0.63 | -0.73 | -0.06 | 0.67 | 0.0032 | $S_3 (S_2)$ |
| 26 | <b>Cuora amboinensis</b>              |  | 0.58 | -0.58 | -0.29 | 0.63 | 0.0071 | $S_3 (S_2)$ |
| 27 | <b>Rhinoclemmys pulcherrima manni</b> |  | 0.56 | -0.55 | -0.36 | 0.58 | 0.0020 | $S_3 (S_2)$ |
| 28 | <b>Phrynops hilarii</b>               |  | 0.45 | -0.73 | 0.13  | 0.47 | 0.0028 | $S_2$       |
| 29 | <b>Carettochelys insculpta</b>        |  | 0.43 | -0.61 | -0.18 | 0.46 | 0.0051 | $S_2$       |
| 30 | <b>Chelonia mydas</b>                 |  | 0.41 | -0.33 | -1.02 | 0.43 | 0.0050 | $S_3 (S_2)$ |
